# Supplementary material for: Comprehensive analysis of Lon proteases in plants highlights independent gene duplication events
Source: PubMed Central journal article supplement (PMC6460959; doi:10.1093/jxb/ery440), 2018-12-24
Supplement: ery440_suppl_supplementary_figures_s1-s6.pdf [file ery440_suppl_supplementary_figures_s1-s6.pdf]

## **Supplementary data**

### **Comprehensive analysis of Lon proteases in plants highlights independent gene duplication events**

Dikran Tsitsekian, Gerasimos Daras, Anastasios Alatzas, Dimitris Templalexis, Polydefkis Hatzopoulos and Stamatis Rigas

This PDF includes: Figs S1-S6

Supplementary Fig. S1.

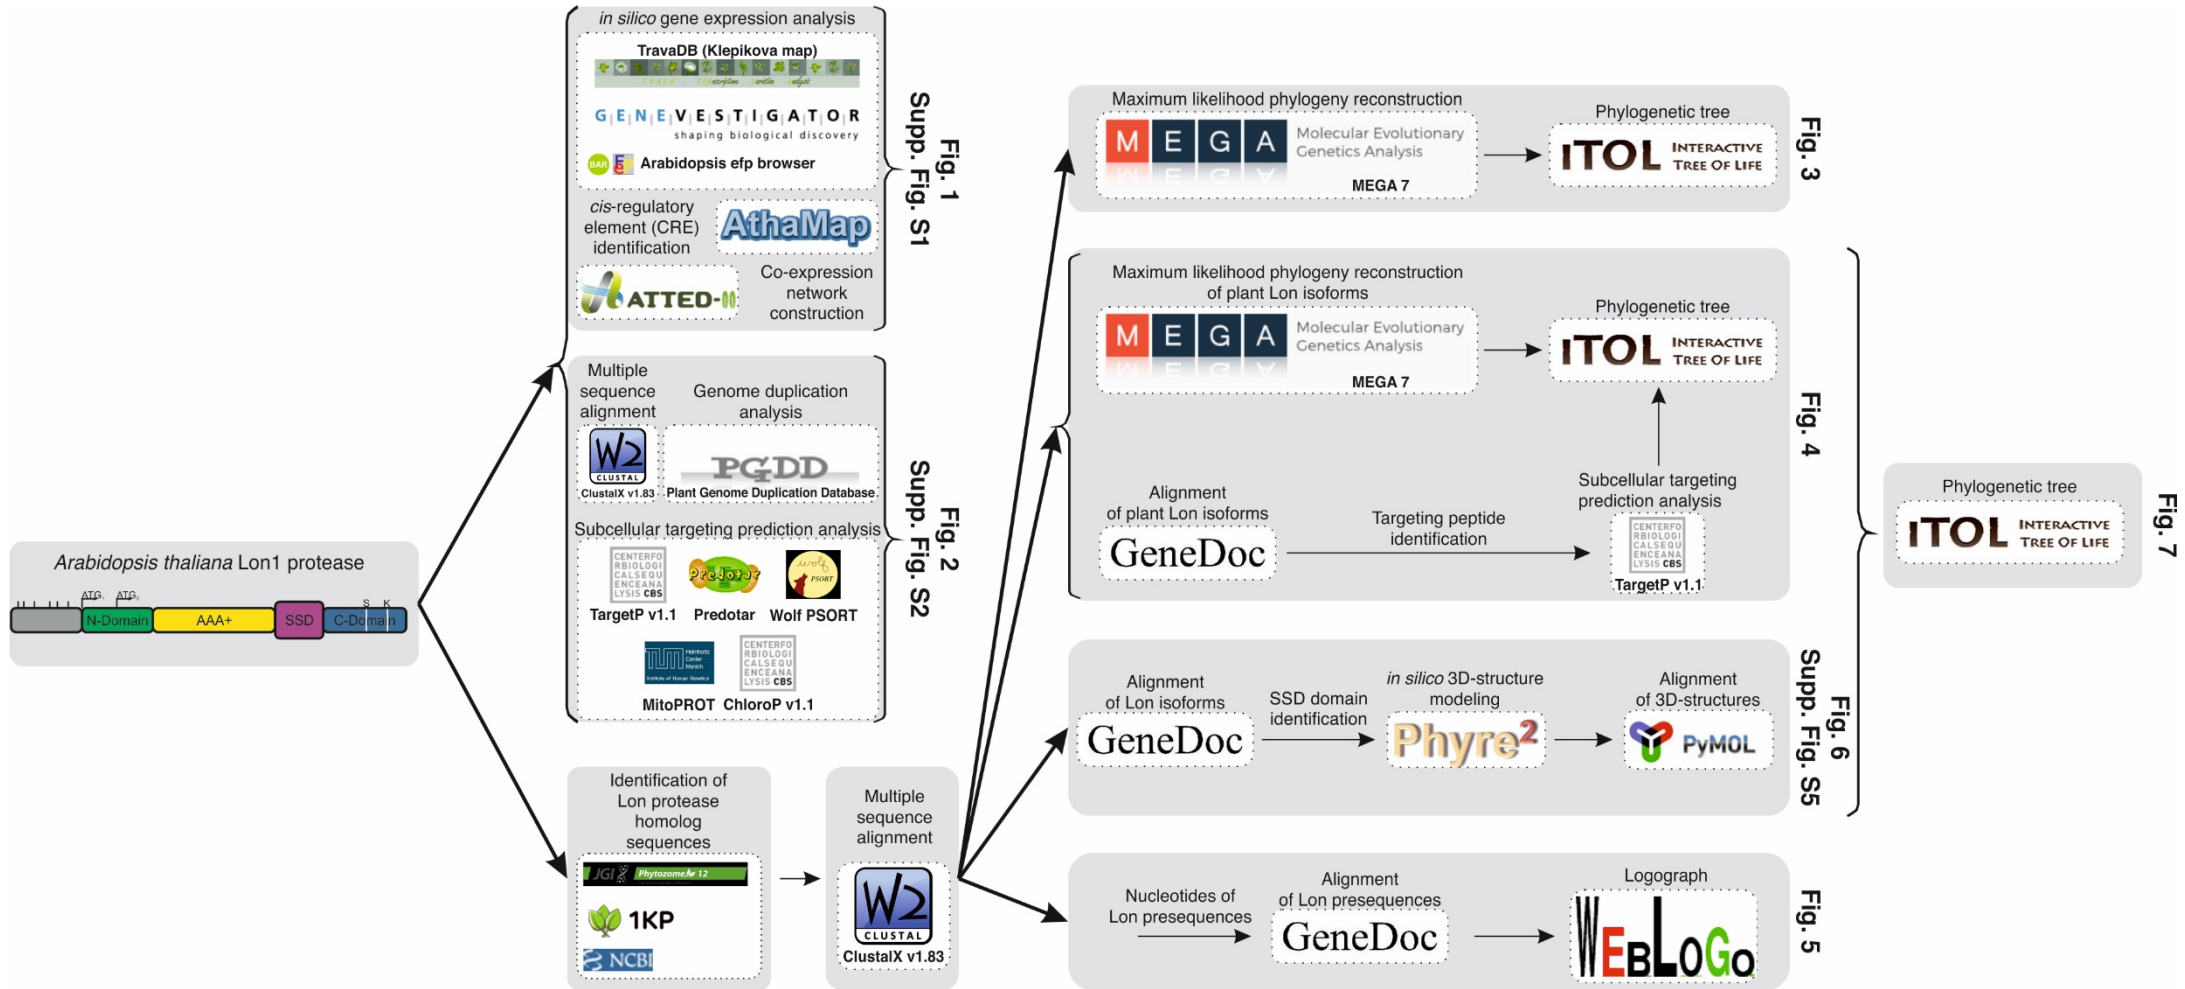

Supplementary Fig. S1. Schematic presentation of the workflow applied to determine the evolutionary history of Lon proteases.

**Supplementary Fig. S2.**

**A**

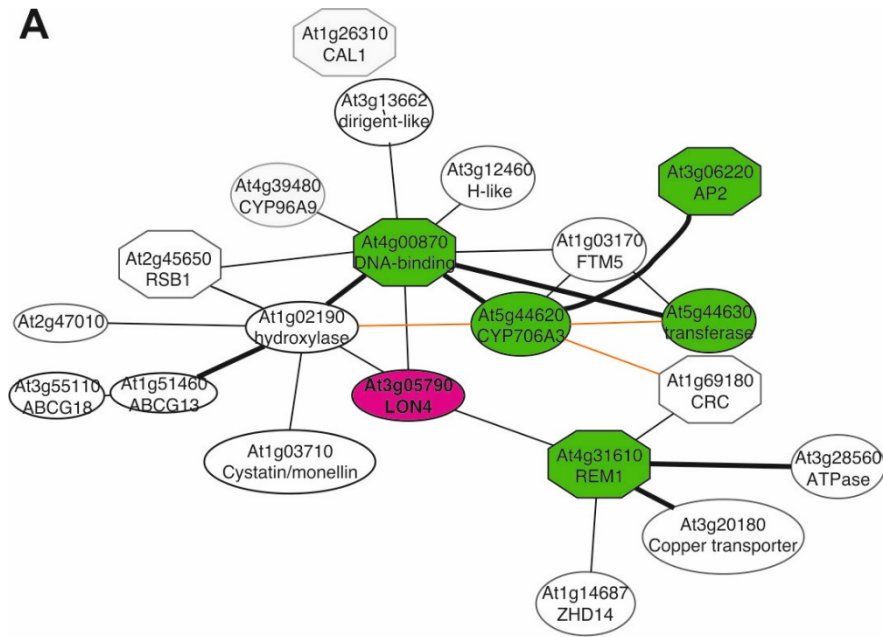

**B**

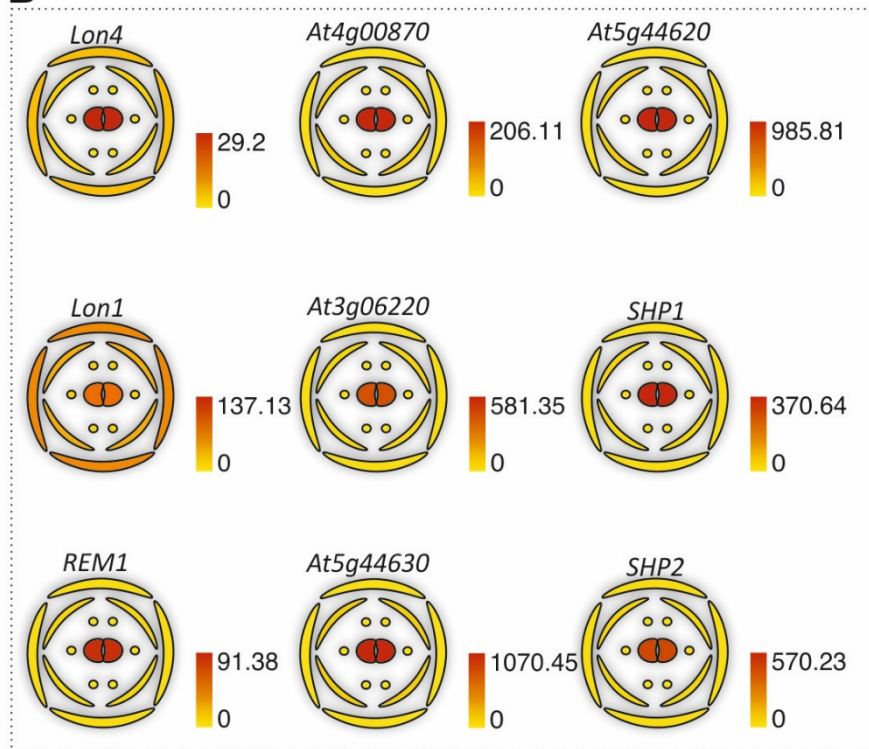

**Supplementary Fig. S2.** *Lon4* is co-expressed with pistil specific genes.

(A) Co-expression analysis of genes that share the *Lon4*-specific CREs. The octagons represent transcription factors. Conservation of co-expression profile identified in non-plant species is shown by the orange line.

(B) Graphical display of genes expression pattern within the floral organs. Levels of absolute expression are shown by the heat-map.

## Supplementary Fig. S3.

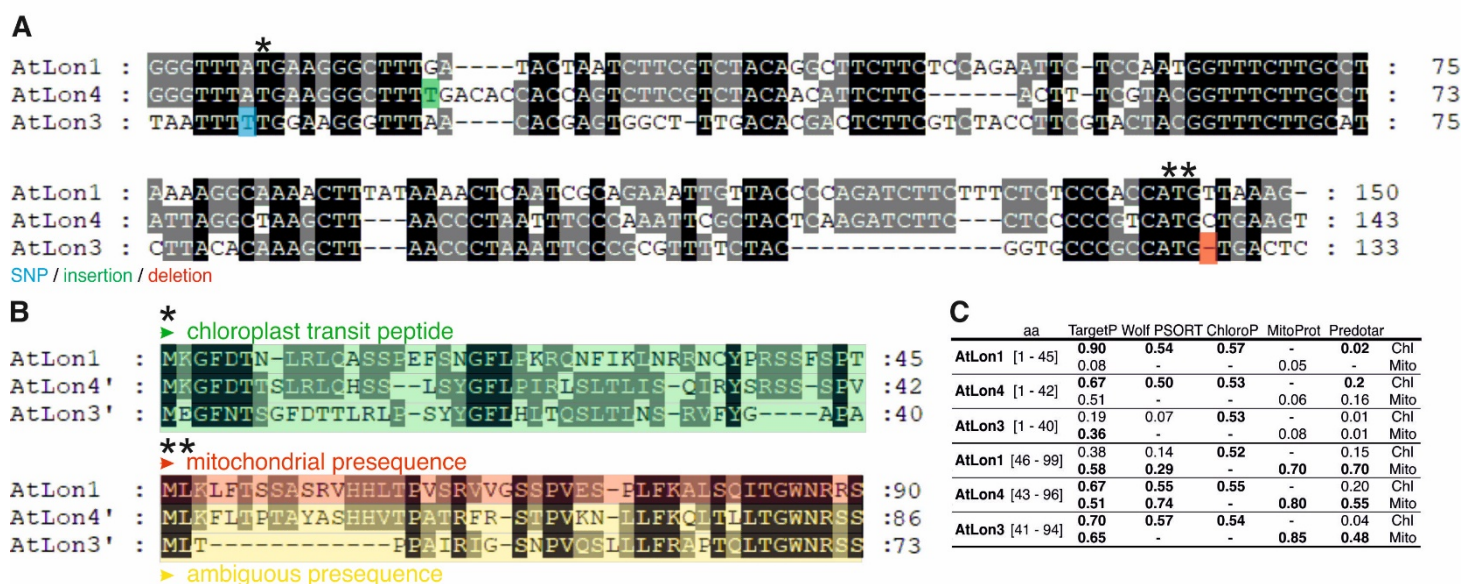

**Supplementary Fig. S3.** Correction of *Lon3* and *Lon4* mutations reconstitutes the N-terminal targeting domain to *Lon1* twin presequences.

(A) Nucleotide sequence alignment of the N-terminal domain showing the two in-frame ATG of *Lon1* and the mutations present at this region of *Lon4* and *Lon3*. Single and double asterisks show the position of the first and second translation initiation codon.

(B) Reversion of the amorphic mutations reconstitutes *Lon4* and *Lon3* N-terminal targeting domains to twin presequences.

(C) Computational predicted subcellular targeting of *Lon4* and *Lon3* acquired twin presequences. The first N-terminal extension of *Lon4* and *Lon3* encompassing the amino acid residues between the two ATG initiation codons, is predicted to be similar to a transit peptide. The N-terminal portion downstream of the second ATG possesses properties for dual-targeting. The values range from 0 (no prediction score) to 1 (highest score probability).

Supplementary Fig. S4.

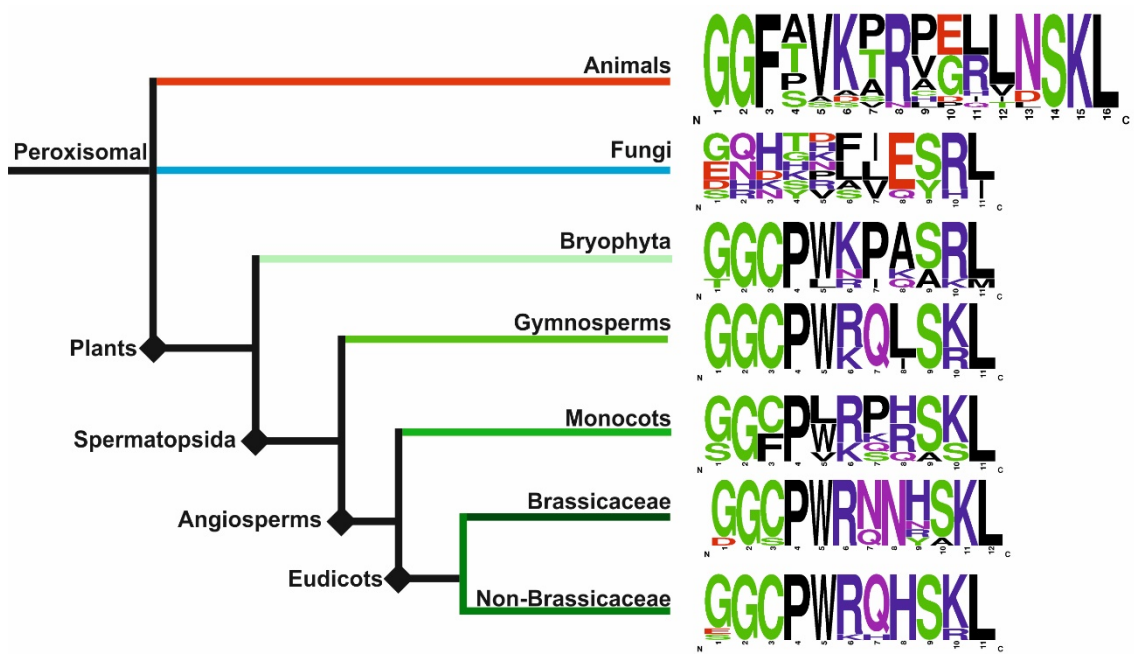

Supplementary Fig. S4. Conservation and dissimilarities of the PTS1 motif in *Lon* peroxisomal homologs.

### Supplementary Fig. S5.

```

AlLon1 : *MKCFDTNLRLQAS-SR--ELSNQ-FLHKRQNFIN-LNLRNCYY----PRSSFSP*MLKLETTSSASR---VQHLLTPAIR-VGSSPVESPLFKAL--- : 80
AtLon1 : MKCFDTNLRLQAS-SP--EFSNG-FLPKRQNFIF-LNRRNCY----PRSSFSP*MLKLETTSSASR---VHHLTPVSRVVGSSPVESPLFKAL--- : 80
CgLon1 : MKCFDTNLRLQAS-SP--DFSNG-FLPKRQNLIN-LNLRNCY----HRSFSP*MLKLETTSSASR---VHHLTPAIR-VGSSSVESPLFKALSQ- : 80
CrLon1 : MKCFDTNLRLQAS-SP--DFSNG-FLPKRQNLIN-LNLRNCY----HRSFSP*MLKLETTSSASR---VHHLTPAIR-VGSSSVESPLFKALSQ- : 80
AaLon1 : MKCFETNLRLQASFSPTLEFPNGFFLPQRQSLIN-LNLRNSN----PRSSSL*MLKLETTSSASR---VHHLTPAIR-AGAASVDSPLFKSL--- : 82
CclLon1 : MCFFNSSAHFPKT-SP--LYFNGTSPNPKLALKFPQNYRLCRS-----SNRNLE*MLKLETTSSAATSCRTHALTATTFRTGAE--PAFFFKALIQ- : 85
CsiLon1 : MCFFNSSAHFPKT-SP--LYFNGTSPNPKLALKFPQNYRLCRS-----SNRNLE*MLKLETTSSAATSCRTHALTATTFRTGAE--PAFFFKALS-- : 83
CpaLon1 : MCFFTPQLHK-TS-SP--NFFNGASLSPKLGSRVNYFFCPSRSLCCCSKNSLE*MLKLETTSSAAS-YRTRCISFVP-RVGPR--QAT----- : 80
EgrLon1 : MCLAATPKSHLL-PPQ-NRSNGVLRPELGHPP-PKIRFCAPG----TFLRPP*MLKLETTSSACLHTRAQRATIRPLSLGTEP-SGP----- : 80
AocLon1 : MCLLN--CNTLLS-PP-LLLFNATSPNLNPPKLSKSFRCFP-----KSLPNST*MLKLETTSSACRQAHAFATVPAFRTPKSSSSPLD- : 83
AocLon4 : -----MLKLETTSSACRQARAFATVPAFRTPKSSSSPLDALSQ- : 41
AtLon4 : -----MLKELTETAYASHHVTPATRFRSTPVKNLLFKQLTLLTGWN : 41

```

**Supplementary Fig. S5.** The N-terminal extension of *Lon1*-like homologs from Sapindales and Brassicales encoding a chloroplast transit peptide for dual-targeting with twin presequences. Single and double asterisks show the position of the first and second translation initiation codon.

# Bacteria

*Asticcacaulis biprosthecum* C19

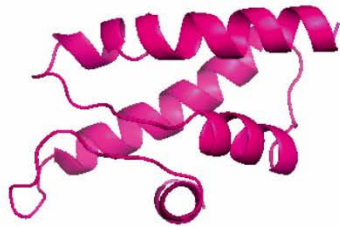

AbiLon

*Asticcacaulis excentricus* CB 48

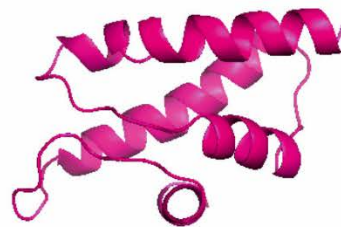

AexLon

*Bacillus anthracis*

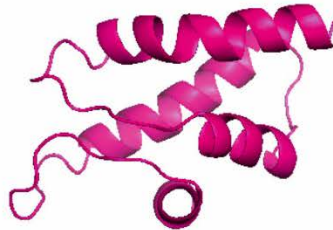

BaLon

*Brevibacillus brevis*

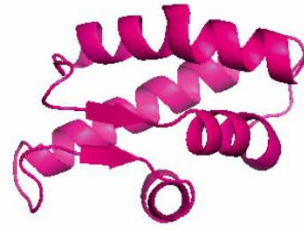

BbLon

*Brevundimonas diminuta*

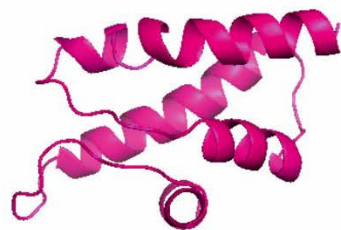

BdiLon

*Brucella melitensis*

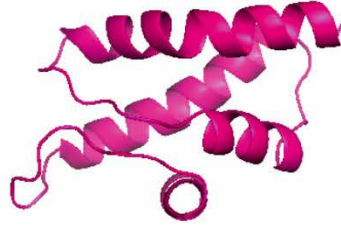

BmeLon

# Bacteria

*Brevundimonas subvibrioides*

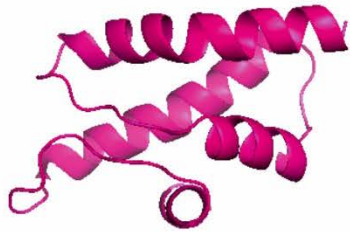

BsuLon

*Caulobacter segnis*

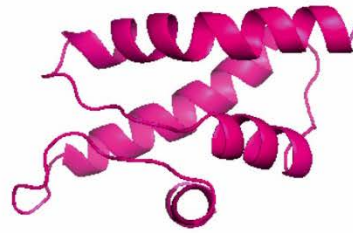

CseLon

*Escherichia coli*

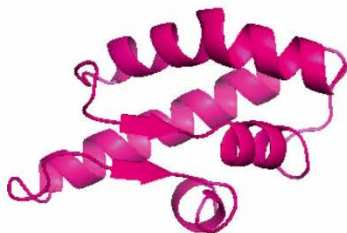

EcLon

*Hirschia baltica*

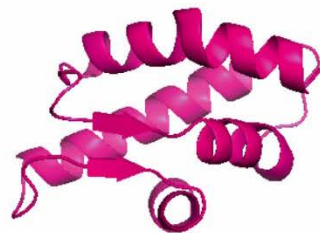

HbaLon

*Hyphomicrobium denitrificans*

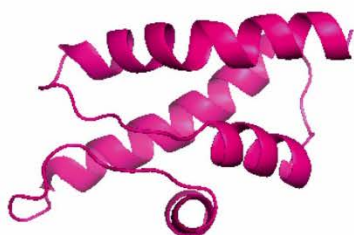

HdeLon

*Neisseria meningitidis*

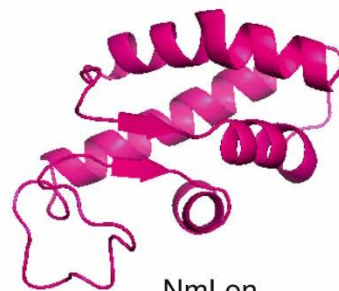

NmLon



# Bacteria

*Pseudomonas aeruginosa*    *Rhodopseudomonas palustris* CGA009

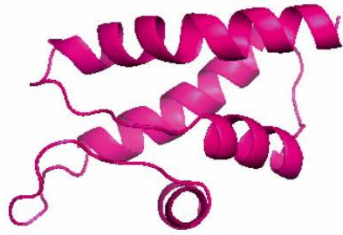

PsaLon

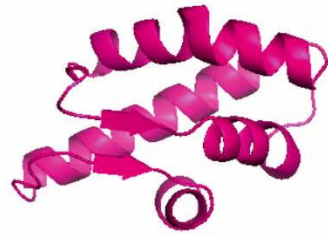

RpaLon

*Rickettsia prowazekii*

*Rhodomicrobium vannielii*

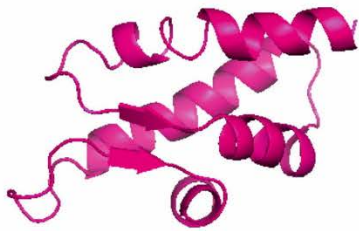

RprLon

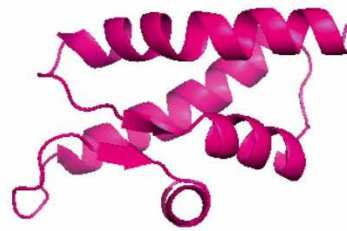

RvaLon

# Fungi

*Aspergillus nidulans*

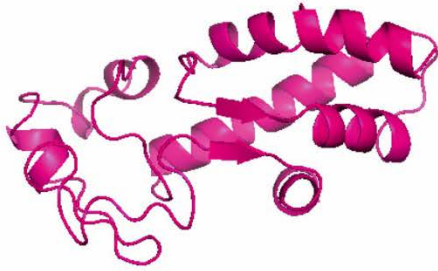

AnidLon1

*Aspergillus niger*

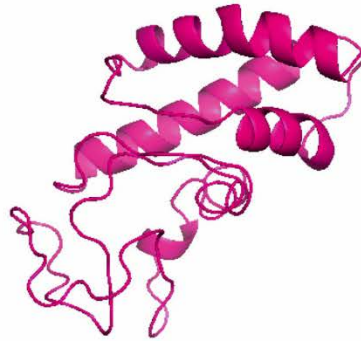

AniLon1

*Aspergillus tubingensis*

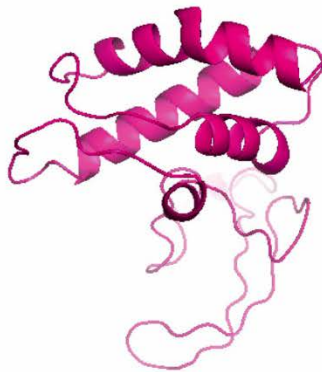

AtuLon1

*Saccharomyces cerevisiae*

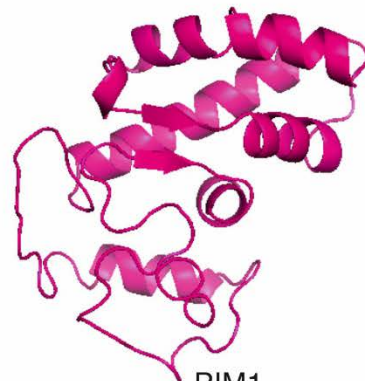

PIM1

*Schizosaccharomyces pombe*

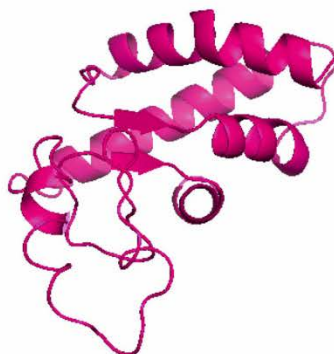

SpomLon

# Fungi

*Neurospora crassa*

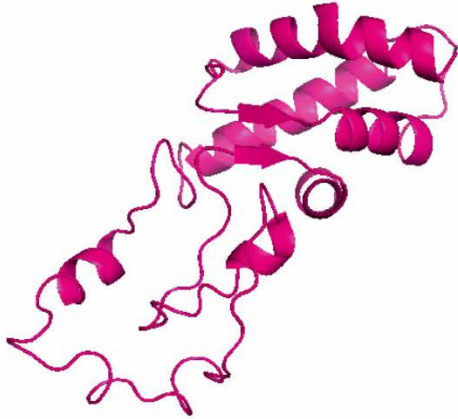

NcrLon1

*Podospora anserina S mat+*

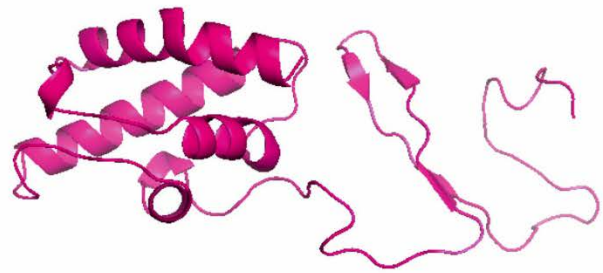

PaLon1

*Candida albicans*

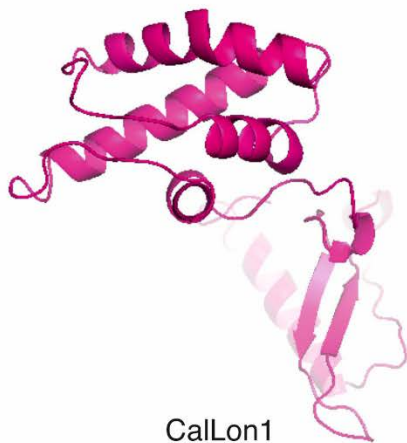

CalLon1

*Candida parapsilosis*

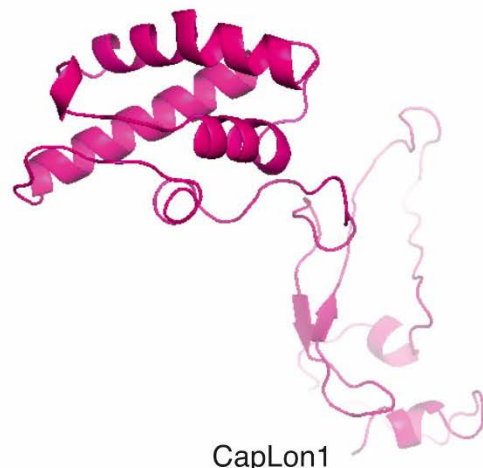

CapLon1

# Algae

## *Chlamydomonas reinhardtii*

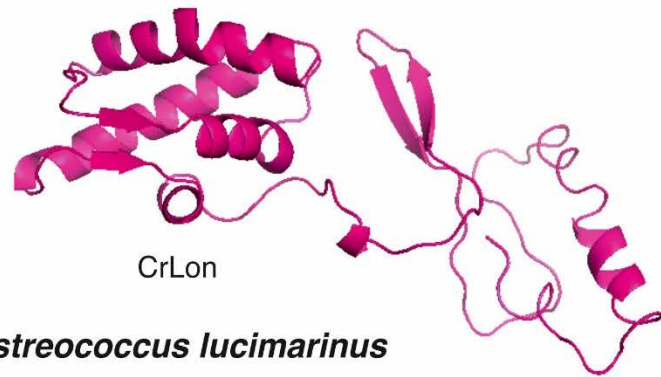

## *Ostreococcus lucimarinus*

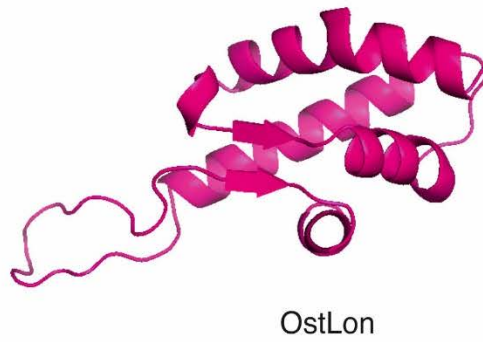

## *Cyanidioschyzon merolae*

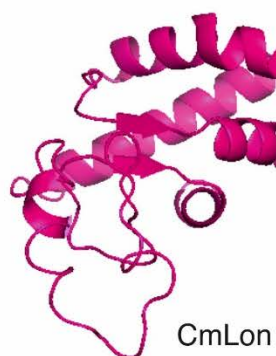

# Bryophyta

## *Physcomitrella patens*

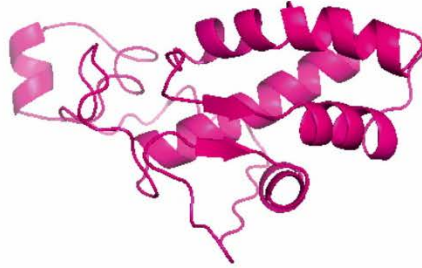

PpaLon1

## *Sphagnum fallax*

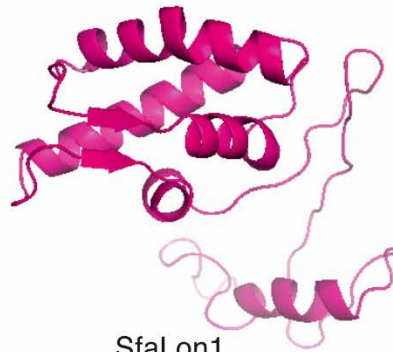

SfaLon1

## *Selaginella moellendorffii*

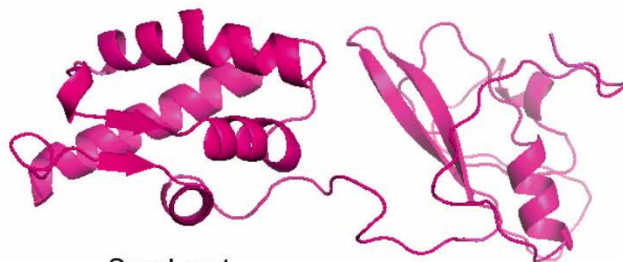

SmoLon1

# Gymnosperms

## *Picea engelmannii*

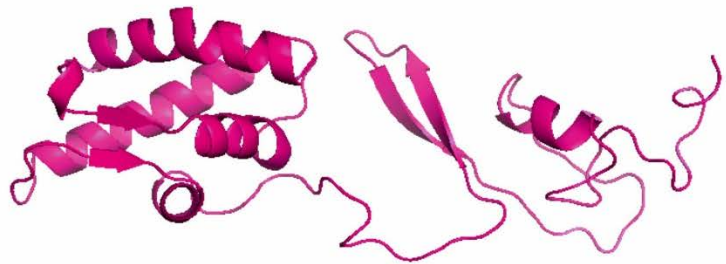

PenLon1

## *Pinus jeffreyi*

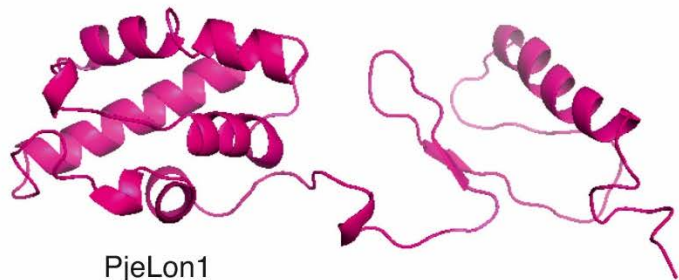

PjeLon1

## *Pinus parviflora*

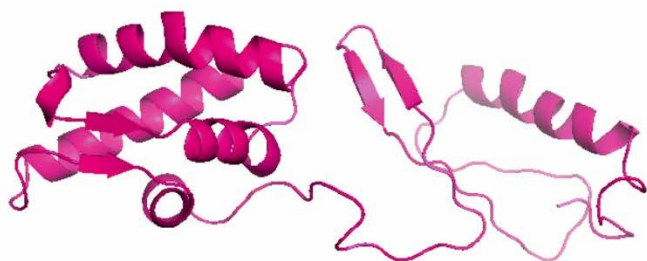

PparLon1

# Gymnosperms

*Pinus radiata*

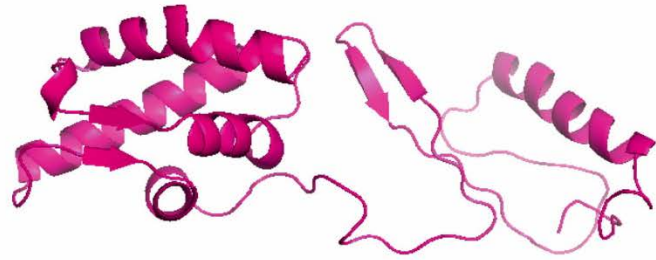

PraLon1

*Taxus baccata*

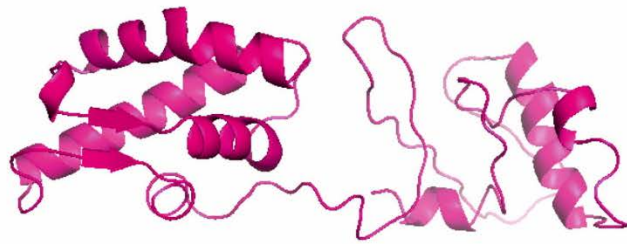

TbaLon1

# Angiosperms

*Amborella trichopoda*

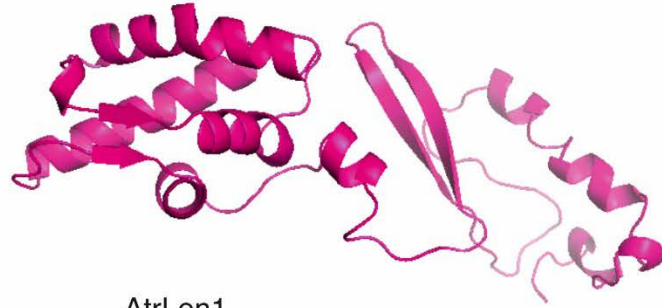

AtrLon1



# Angiosperms

## Monocots

*Ananas comosus*

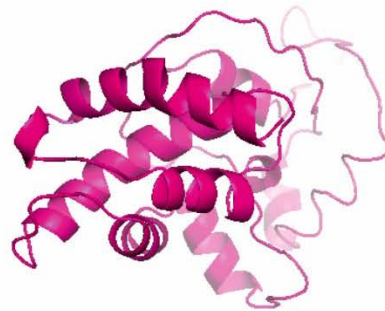

AcoLon1

*Brachypodium distachyon*

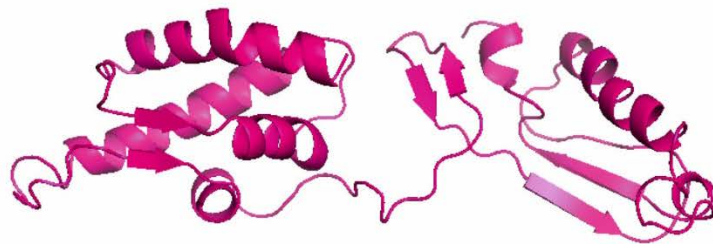

BdiLon1

*Brachypodium stacei*

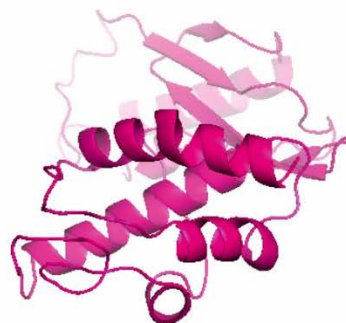

BstLon1

# Angiosperms

## Monocots

*Oryza sativa*

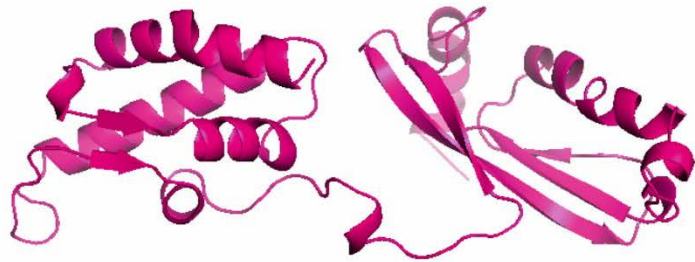

OsLonP1

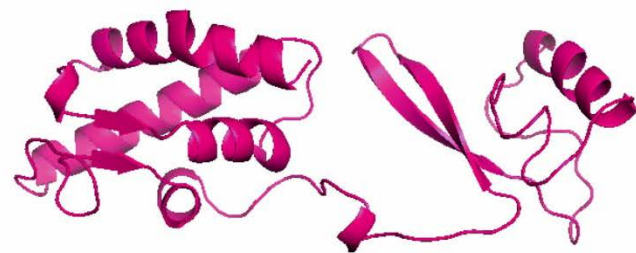

OsLonP3

*Zostera marina*

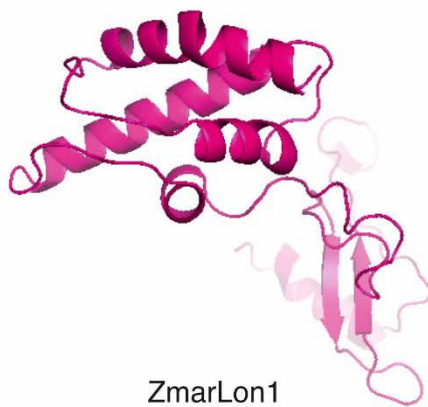

ZmarLon1

# Angiosperms

## Monocots

*Panicum hallii*

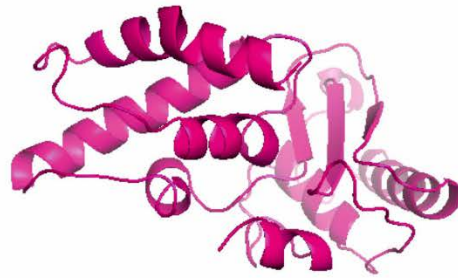

PhaLon1

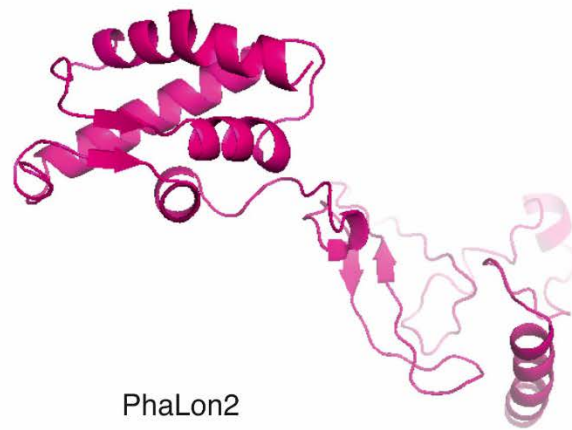

PhaLon2

# Angiosperms

## Monocots

*Sorghum bicolor*

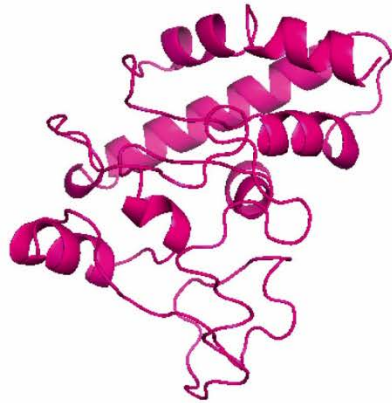

SbiLon1

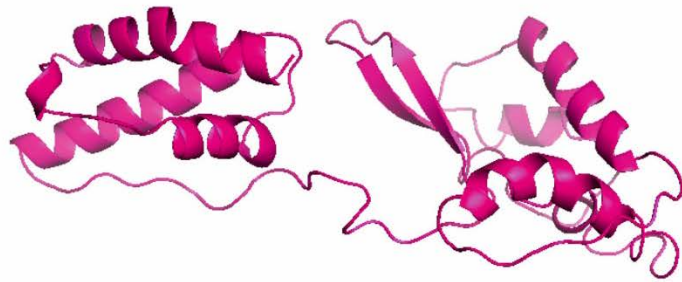

SbiLon2

# Angiosperms

## Monocots

*Setaria italica*

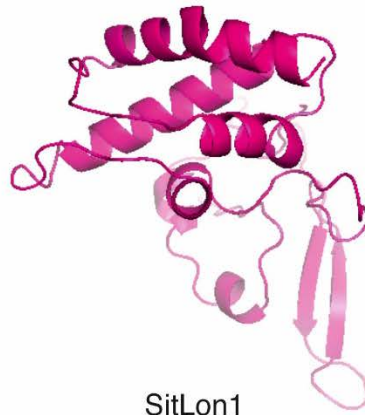

SitLon1

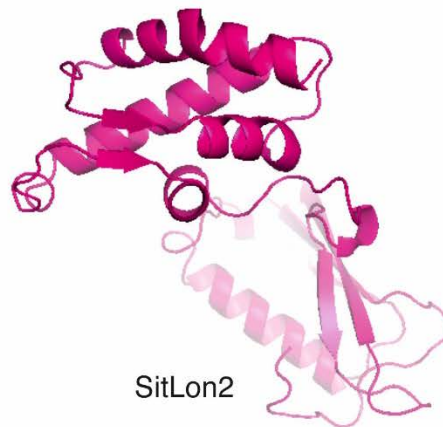

SitLon2

# Angiosperms

Eudicots, Class: Brassicales

*Arabis alpina*

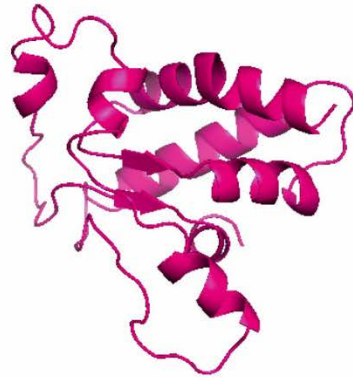

AaLon1

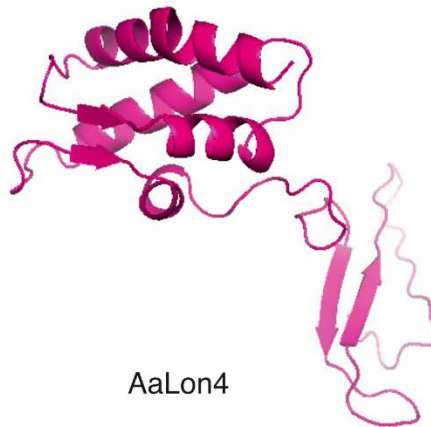

AaLon4

# Angiosperms

Eudicots, Class: Brassicales

*Arabidopsis lyrata*

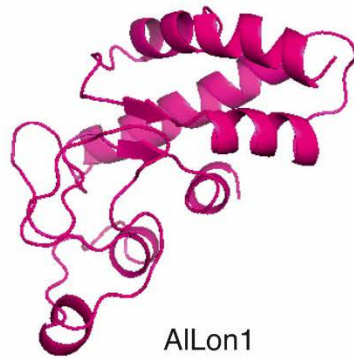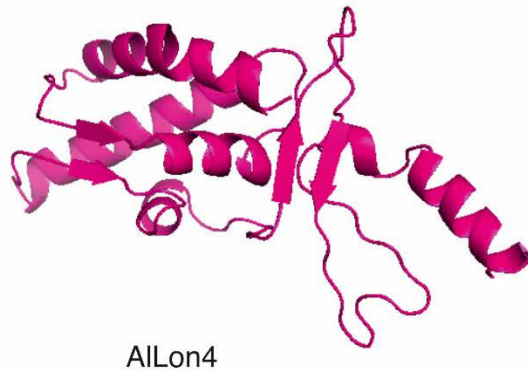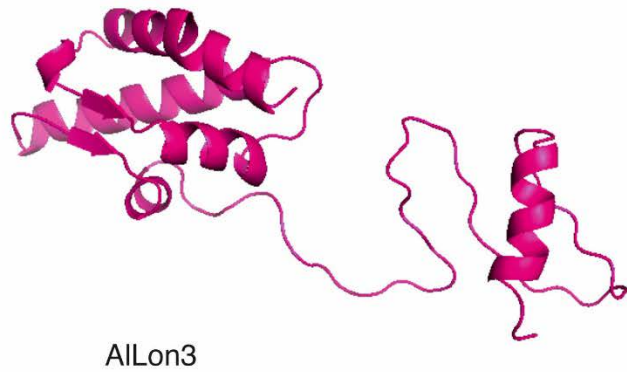

# Angiosperms

Eudicots, Class: Brassicales

*Arabidopsis thaliana*

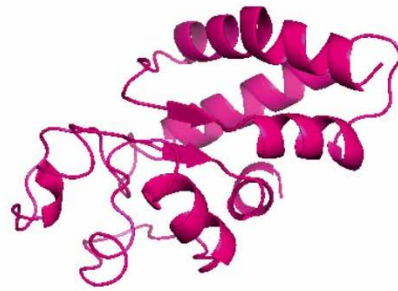

AtLon1

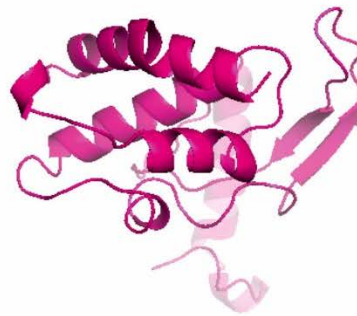

AtLon4

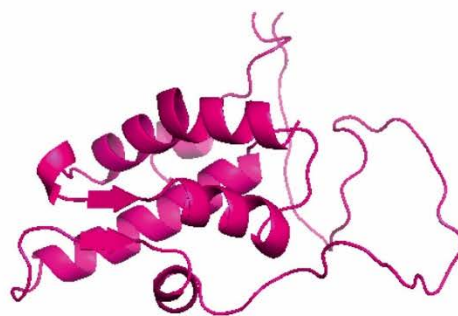

AtLon3



# Angiosperms

Eudicots, Class: Brassicales

*Capsella grandiflora*

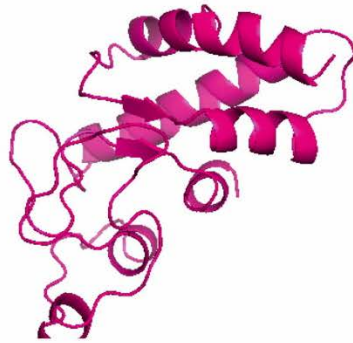

CgLon1

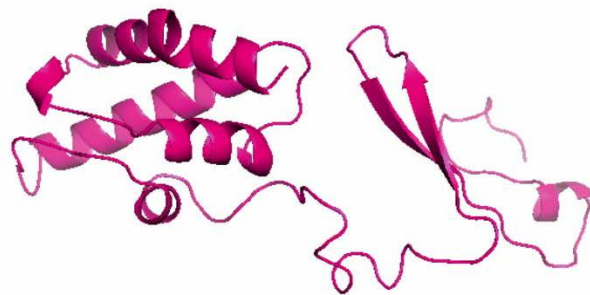

CgLon4

*Carica papaya*

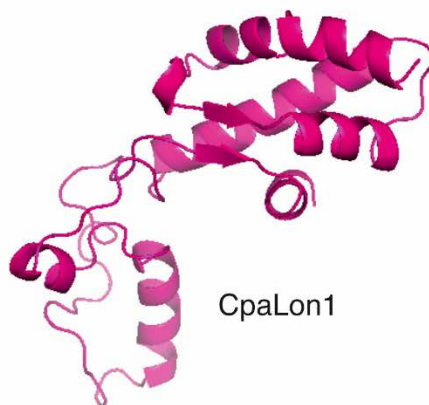

CpaLon1

# Angiosperms

Eudicots, Class: Brassicales

*Capsella rubella*

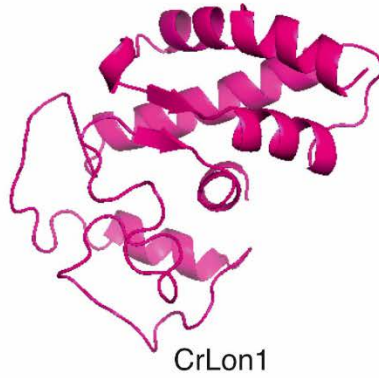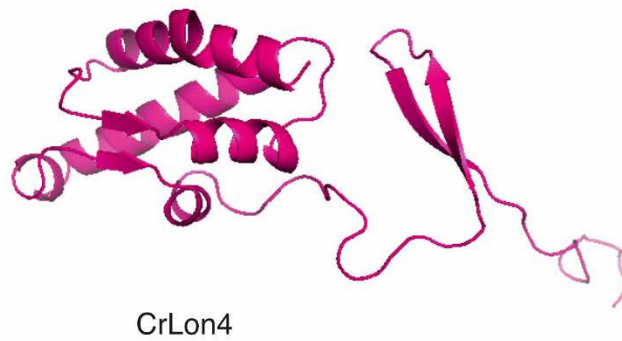

# Angiosperms

Eudicots, Class: Sapindales

*Citrus clementina*

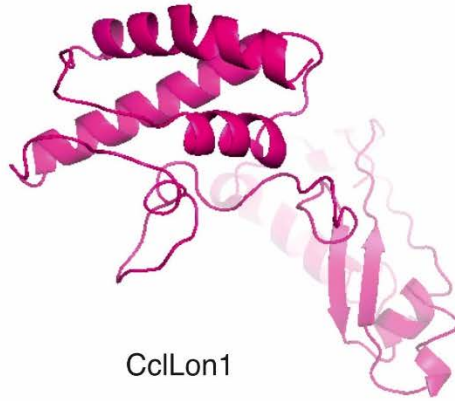

*Citrus sinensis*

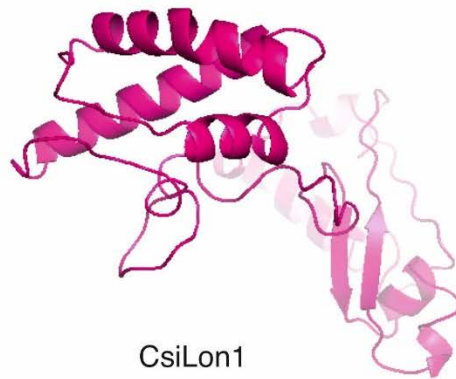

# Angiosperms

Eudicots, Class: Sapindales

*Anacardium occidentale*

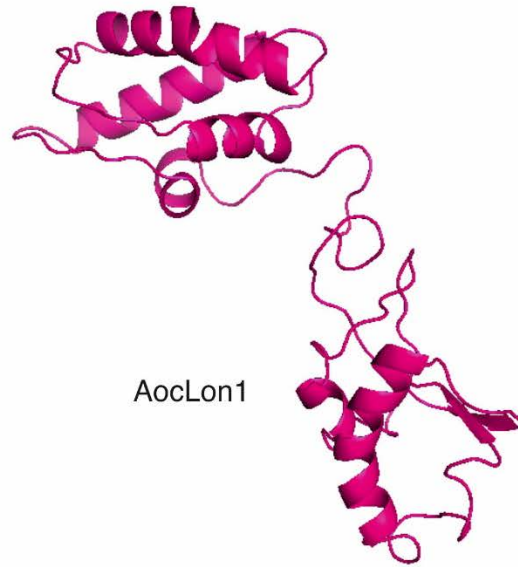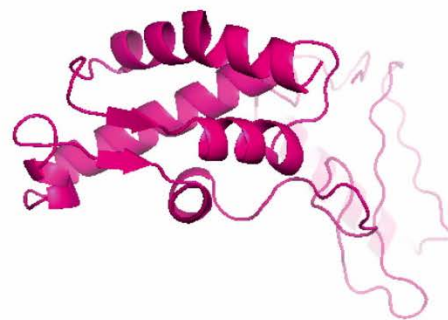

# Angiosperms

Eudicots, Class: Rosales

*Prunus persica*

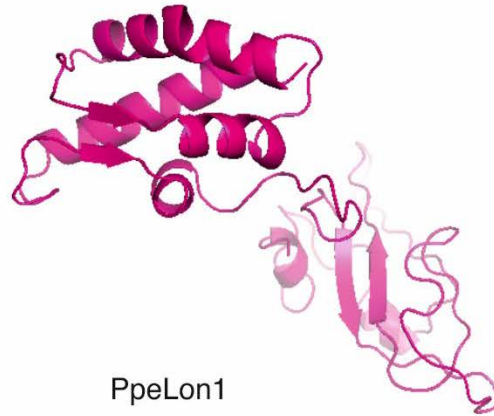

PpeLon1

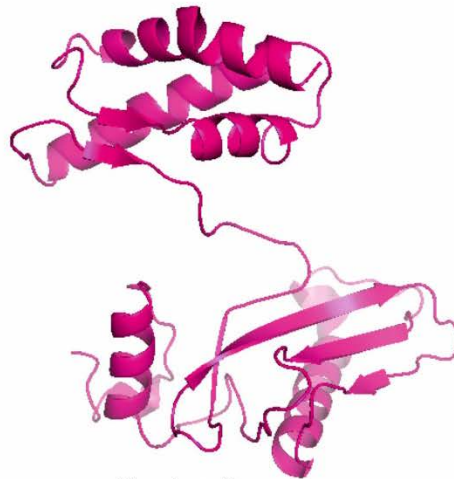

PpeLon2

# Angiosperms

Eudicots, Class: Rosales

*Fragaria vesca*

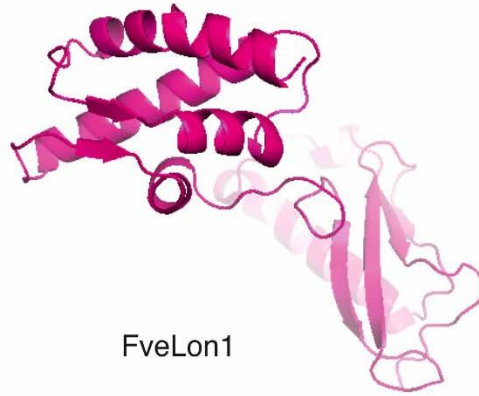

FveLon1

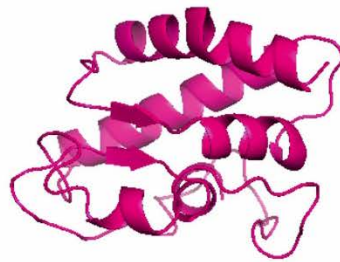

FveLon2

# Angiosperms

Eudicots, Class: Fabales

*Glycine max*

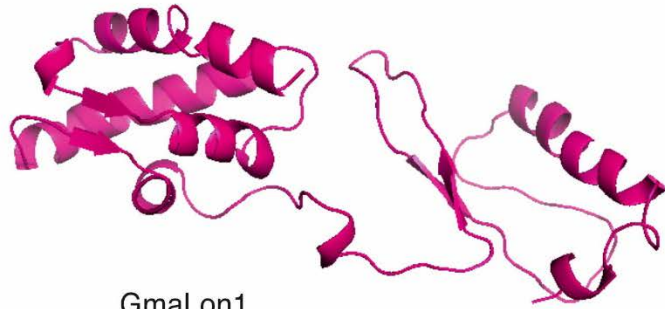

GmaLon1

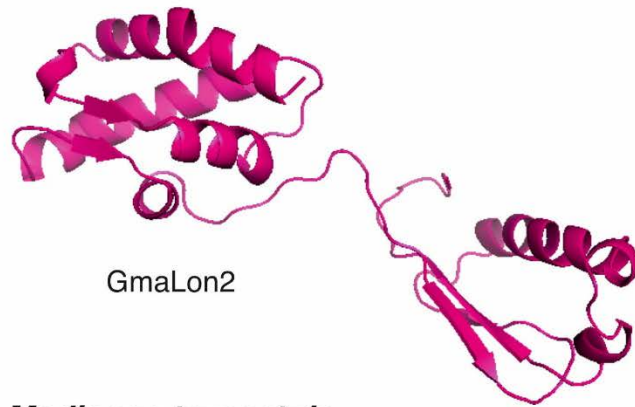

GmaLon2

*Medicago truncatula*

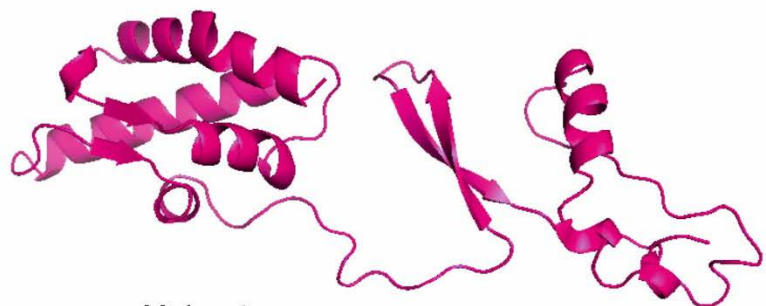

MtrLon1

# Angiosperms

Eudicots, Class: Fabales

*Trifolium pratense*

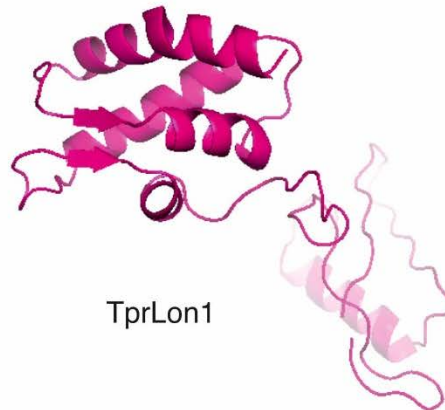

TprLon1

*Phaseolus vulgaris*

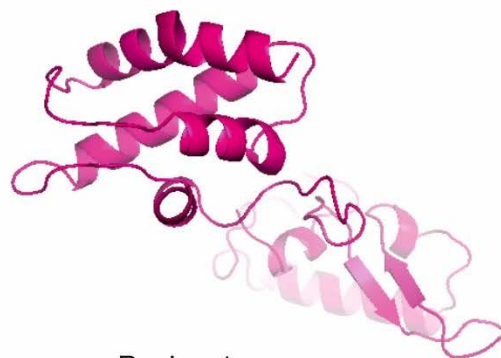

PvuLon1



# Angiosperms

Eudicots, Class: Malvales

*Gossypium hirsutum*

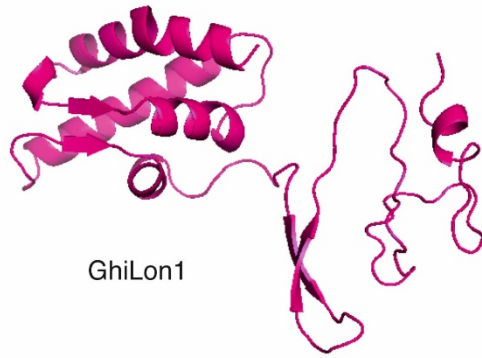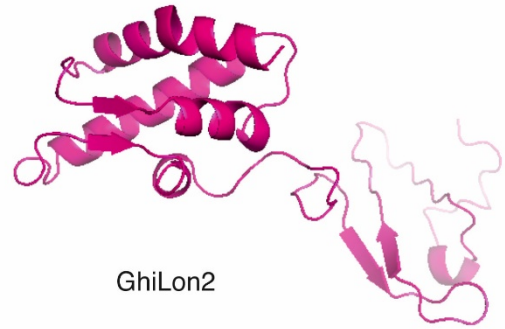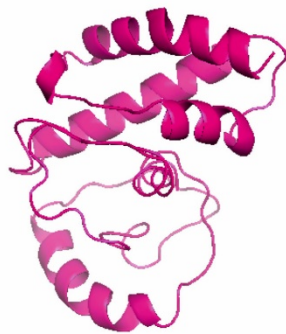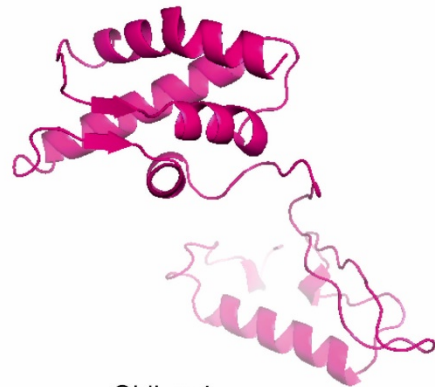

# Angiosperms

Eudicots, Class: Malvales

*Gossypium raimondii*

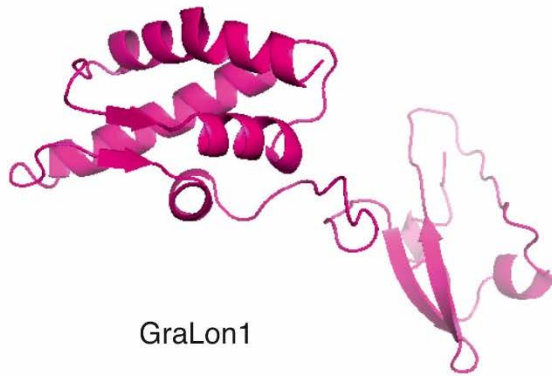

GraLon1

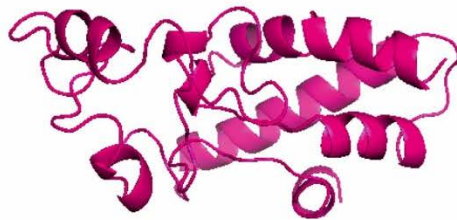

GraLon4

*Theobroma cacao*

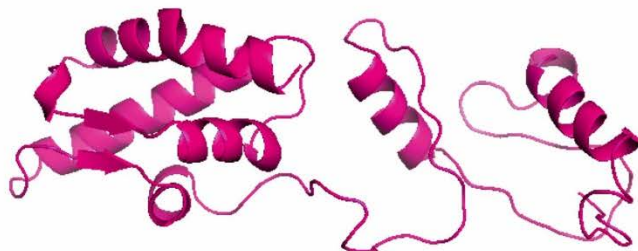

TcLon1

# Angiosperms

Eudicots, Class: Malpighiales

*Populus deltoides*

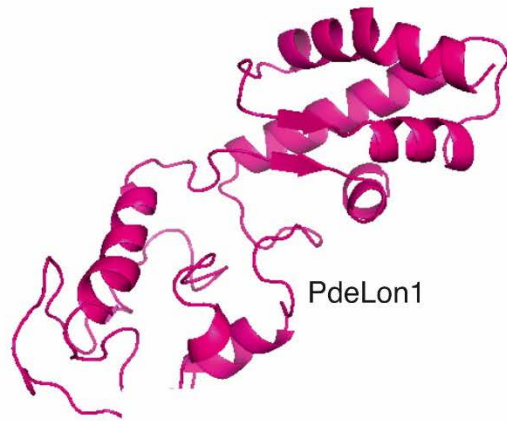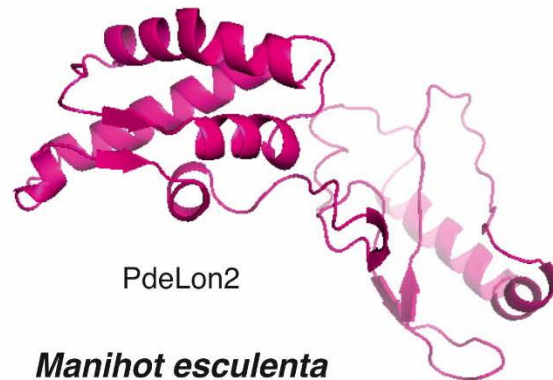

*Manihot esculenta*

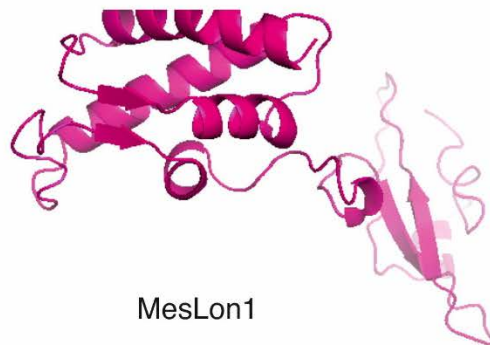

# Angiosperms

Eudicots, Class: Malpighiales

*Populus trichocarpa*

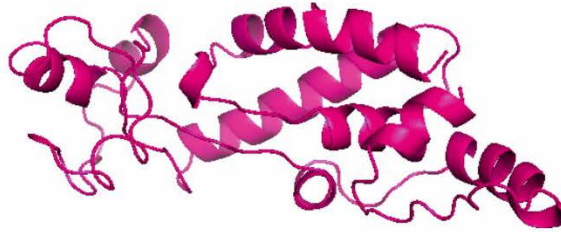

PtrLon1

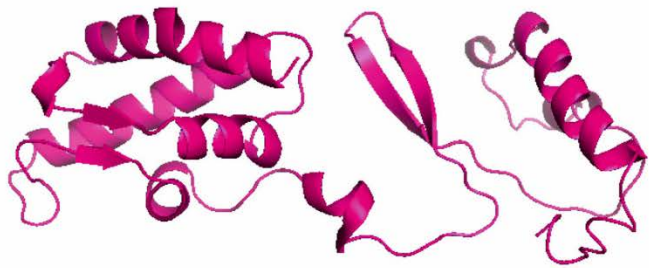

PtrLon2

*Salix purpurea*

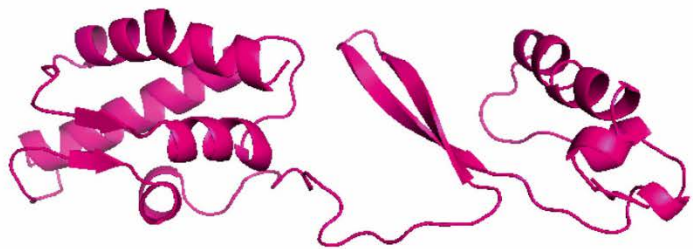

SpuLon1

# Angiosperms

Eudicots, Class: Asterids

*Coffea arabica*

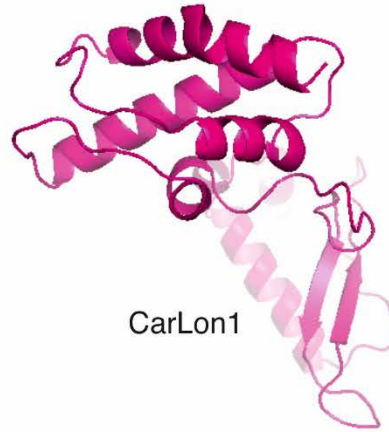

*Helianthus annuus*

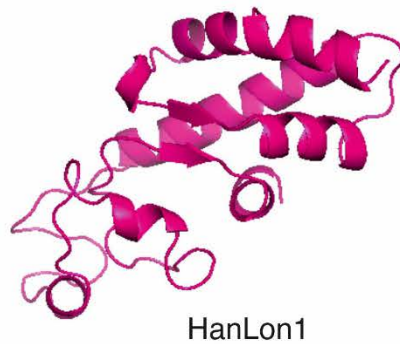

*Lactuca sativa*

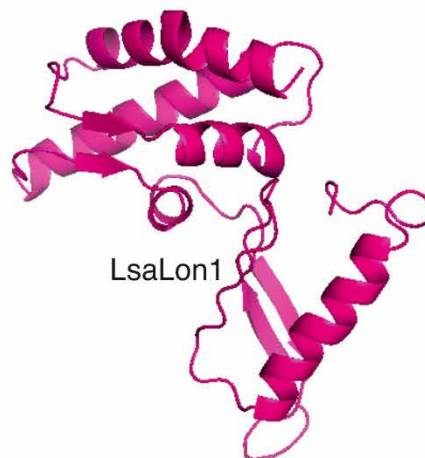

# Angiosperms

Eudicots, Class: Asterids

*Mimulus guttatus*

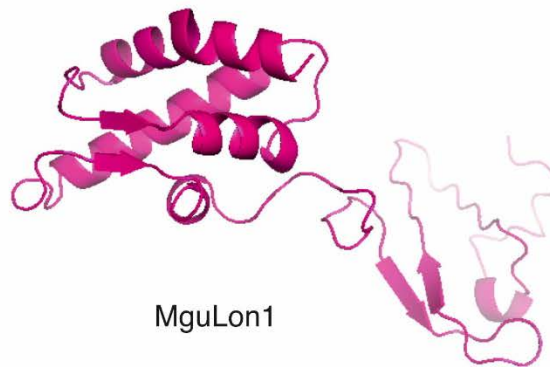

MguLon1

*Olea europaea*

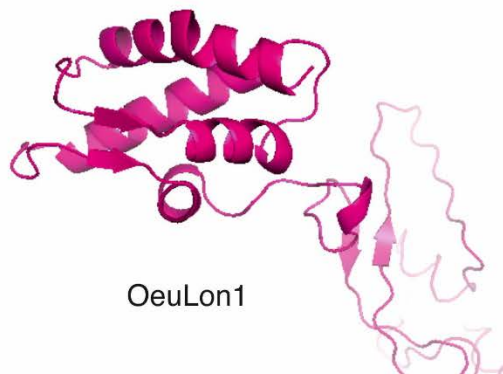

OeuLon1

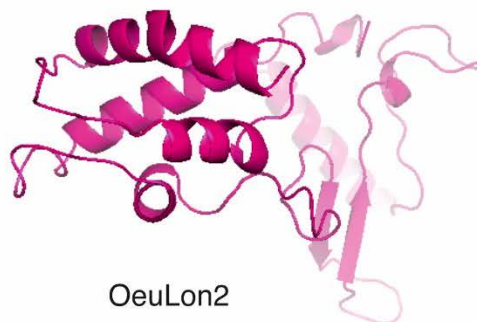

OeuLon2

# Angiosperms

Eudicots, Class: Myrtales

*Eucalyptus grandis*

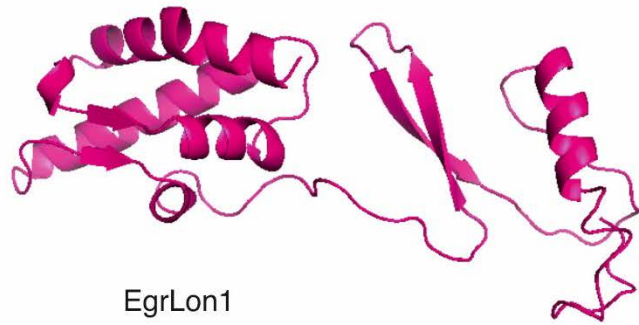

EgrLon1

# Angiosperms

Eudicots, Class: Cucurbitales

*Cucumis sativus*

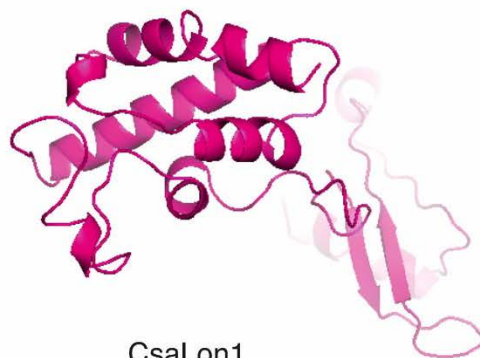

CsaLon1

# Animalia

*Homo sapiens*

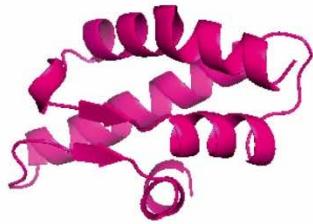

HsLonP1

*Pan troglodytes*

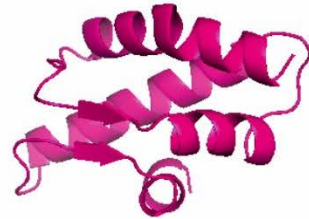

PtLonP1

*Bos taurus*

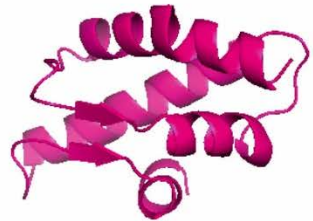

BtLonP1

*Canis lupus familiaris*

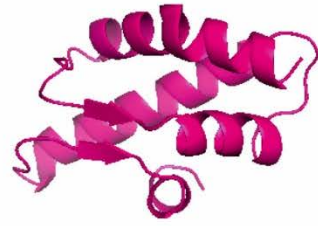

ClfLonP1

*Mus musculus*

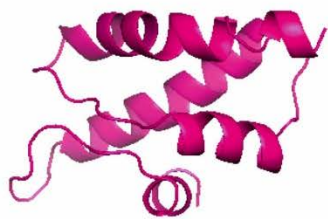

MmLonP1

*Rattus norvegicus*

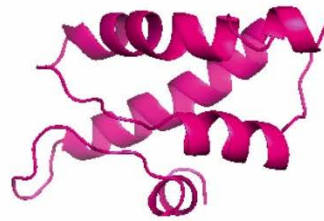

RnLonP1



# Animalia

*Cavia porcellus*

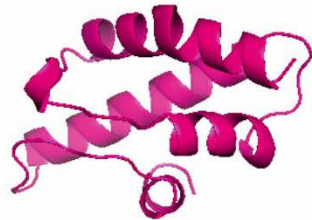

CpLonP1

*Salmo salar*

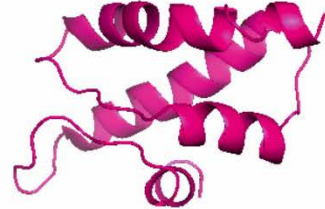

SsLonP1

*Callorhinchus milii*

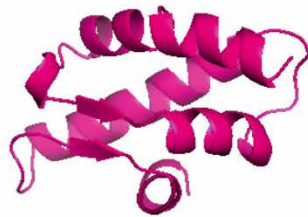

CmLonP1

*Danio rerio*

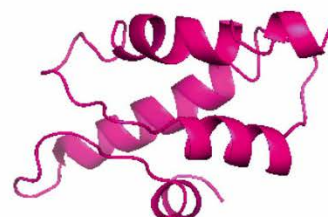

DrLonP1

*Meleagris gallopavo*

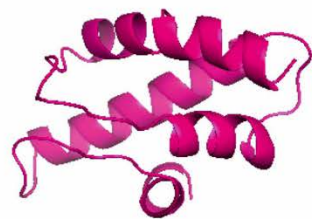

MgLonP1

*Ficedula albicollis*

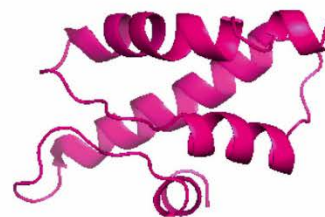

FaLonP1

# Animalia

*Gallus gallus*

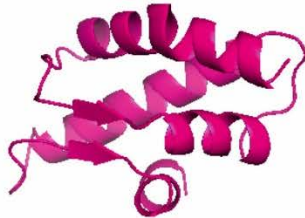

GgLonP1

*Haliaeetus leucocephalus*

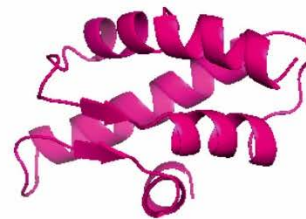

HILonP1

*Pelecanus crispus*

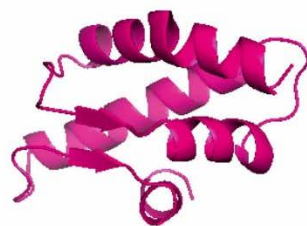

PcLonP1

*Falco cherrug*

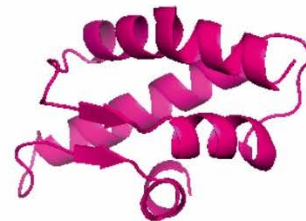

FcLonP1

*Falco peregrinus*

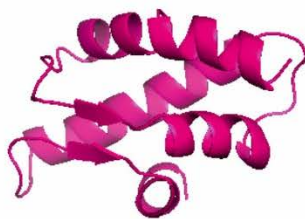

FpLonP1

**Supplementary Fig. S6.** Molecular modeling of the sensor- and substrate-discrimination (SSD) domain reveals the functional features of Lon proteases. The Lon protein accessions and the coordinates of the SSD domains are shown in [Supplementary Table S3](#). The analysis was performed on the basis of known crystallographic data mainly available from AAA<sup>+</sup> proteins and bacterial Lon proteases, which were automatically detected by the Phyre2 Protein Fold Recognition Server

([www.sbg.bio.ic.ac.uk/phyre2](http://www.sbg.bio.ic.ac.uk/phyre2)). The ribbon model was generated in PyMol ([www.pymol.org](http://www.pymol.org)).
